# Supplementary material for: Pretreatment Neutrophil-to-Lymphocyte Ratio as a Prognostic Marker for the Outcome of HPV-Positive and HPV-Negative Oropharyngeal Squamous Cell Carcinoma
Source: MDPI journal article supplement (doi:10.3390/v15010198), 2023-01-10

**Figure S1.** Flowchart of patient exclusion from the database population to the final included study population.

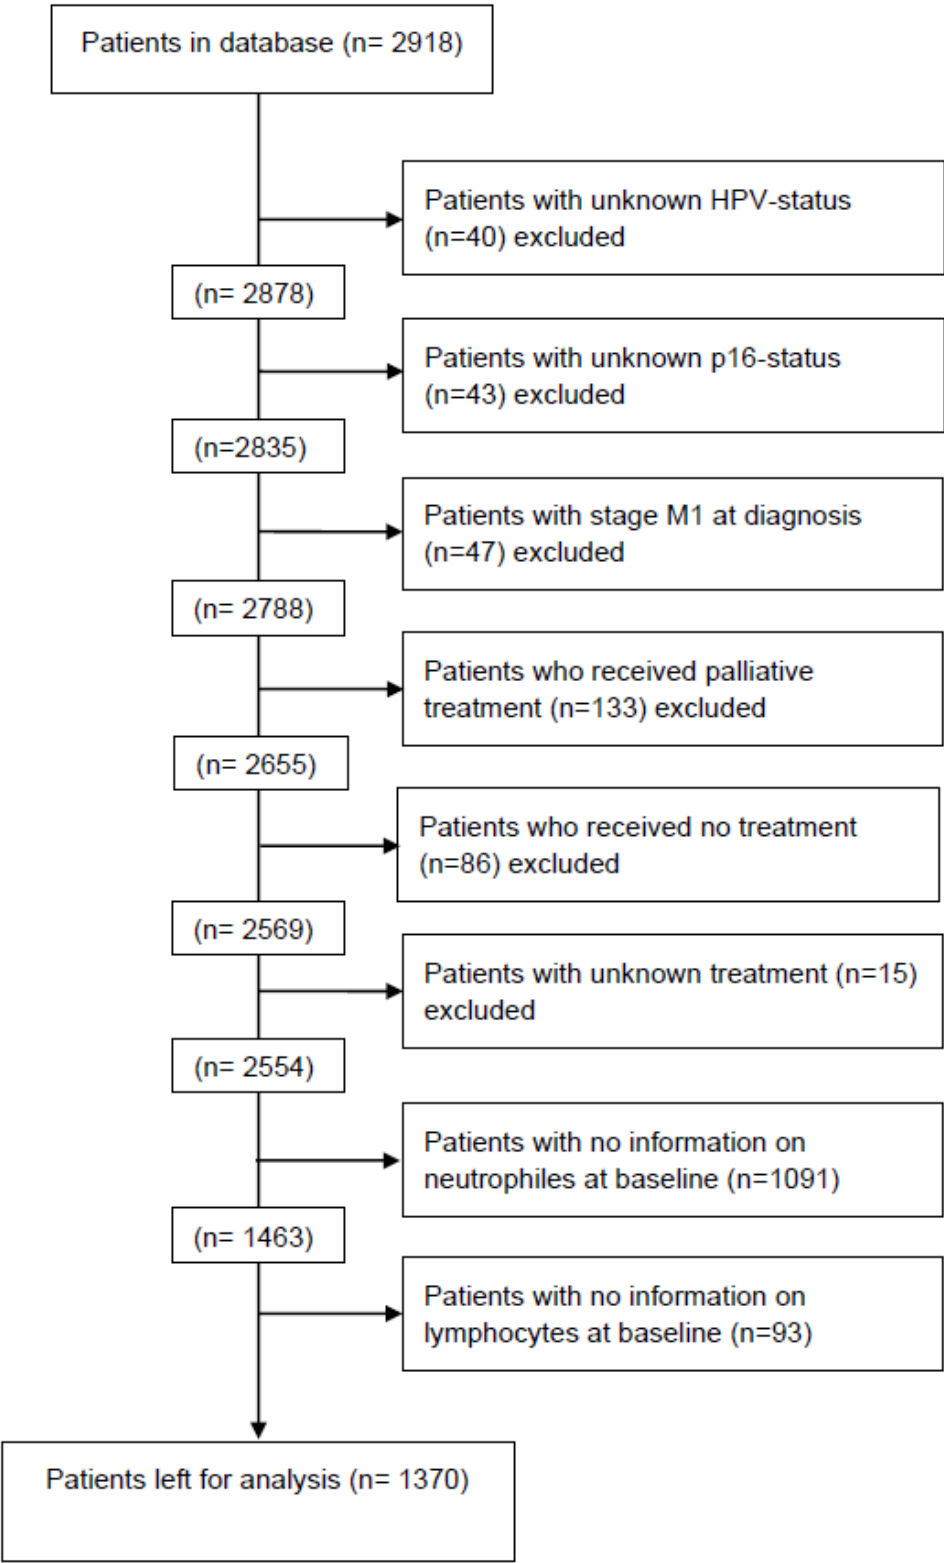

Supplement: s1 [file s1]
