# Supplementary figures and images for: Pretreatment Neutrophil-to-Lymphocyte Ratio as a Prognostic Marker for the Outcome of HPV-Positive and HPV-Negative Oropharyngeal Squamous Cell Carcinoma
Source: MDPI journal article supplement (doi:10.3390/v15010198), 2023-01-10

Figure S2. Proportional Hazards test with Schoenfeld residuals for categorical covariates.

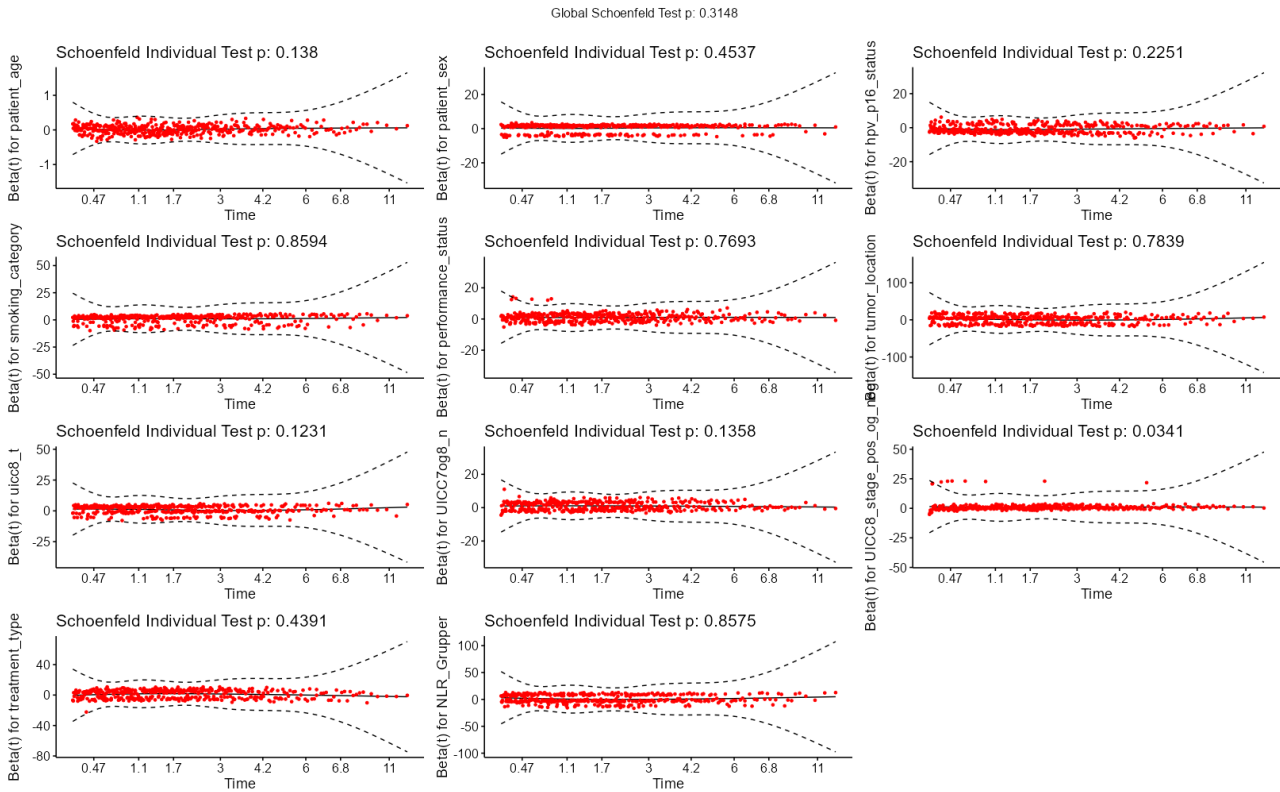

Supplement: s1 [file s1]

**Figure S3.** Non-linearity test with Martingale Residual of continuous covariate patient age.

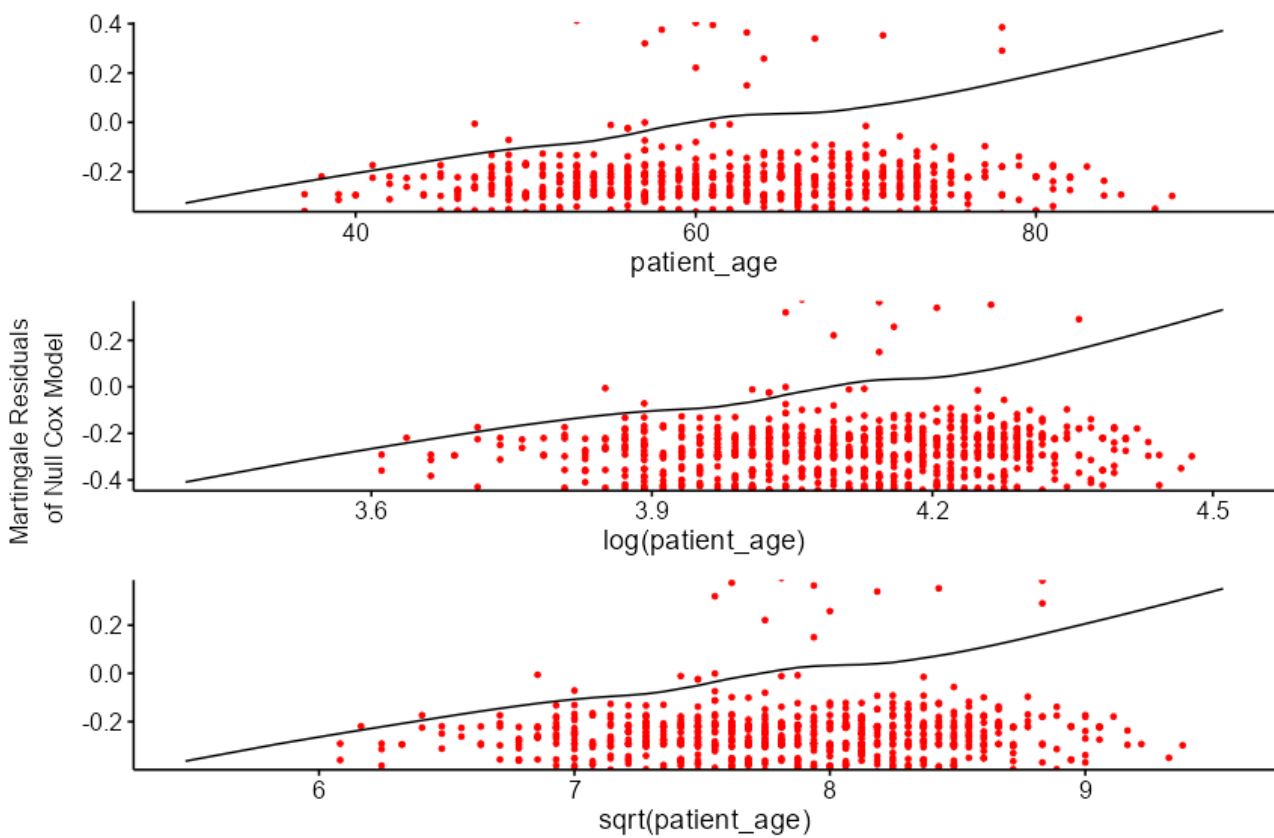

Supplement: s1 [file s1]
